# Supplementary material for: Open-label phase II study evaluating safety and efficacy of the non-steroidal farnesoid X receptor agonist PX-104 in non-alcoholic fatty liver disease
Source: PubMed Central journal article supplement (PMC8116226; doi:10.1007/s00508-020-01735-5), 2020-09-15

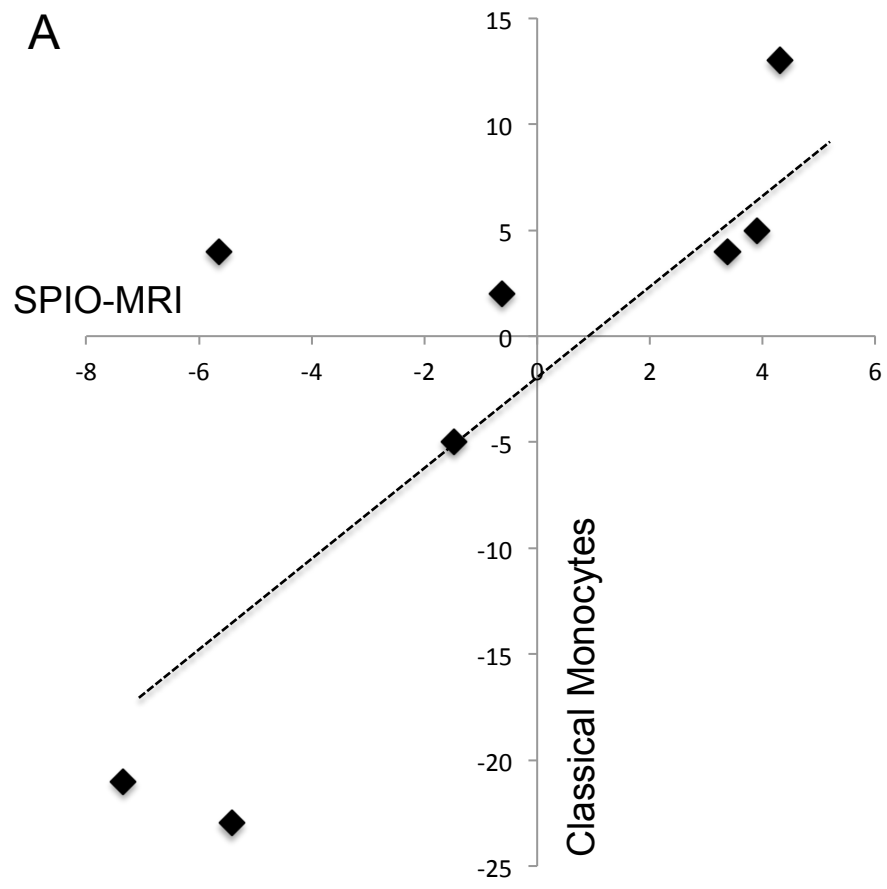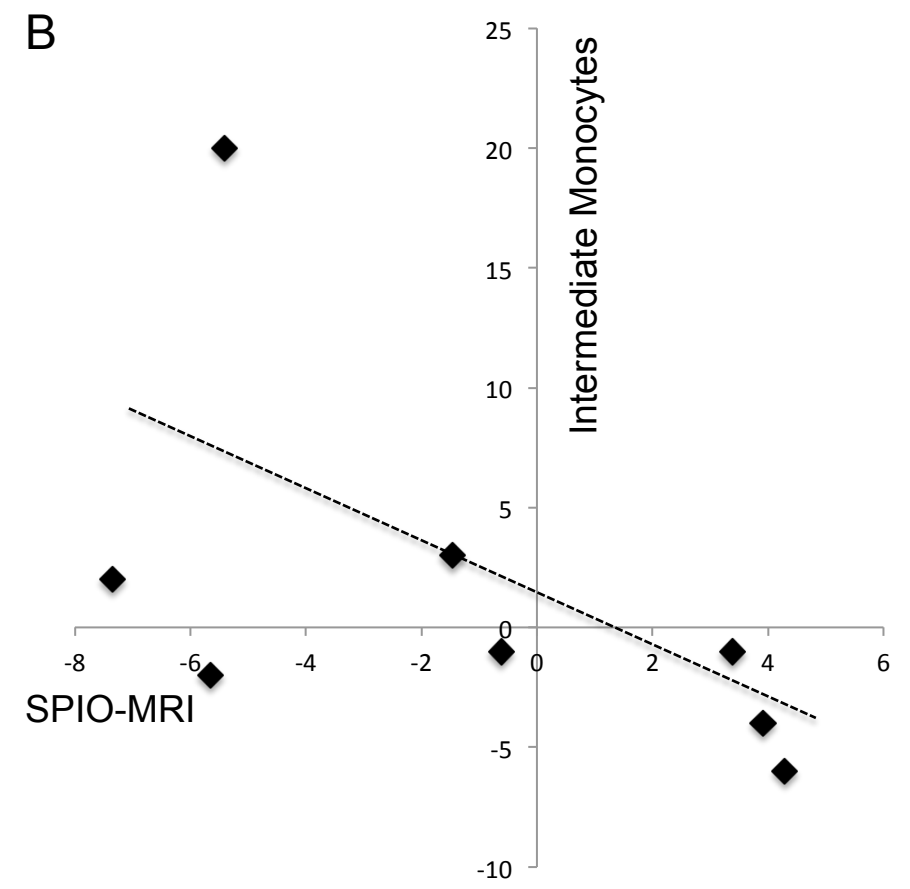

Supplement: 508_2020_1735_MOESM1_ESM.pdf [file 508_2020_1735_MOESM1_ESM.pdf]
