# Supplementary material for: Open-label phase II study evaluating safety and efficacy of the non-steroidal farnesoid X receptor agonist PX-104 in non-alcoholic fatty liver disease
Source: Springer Nature journal article supplement (doi:10.1007/s00508-020-01735-5), 2020-09-15

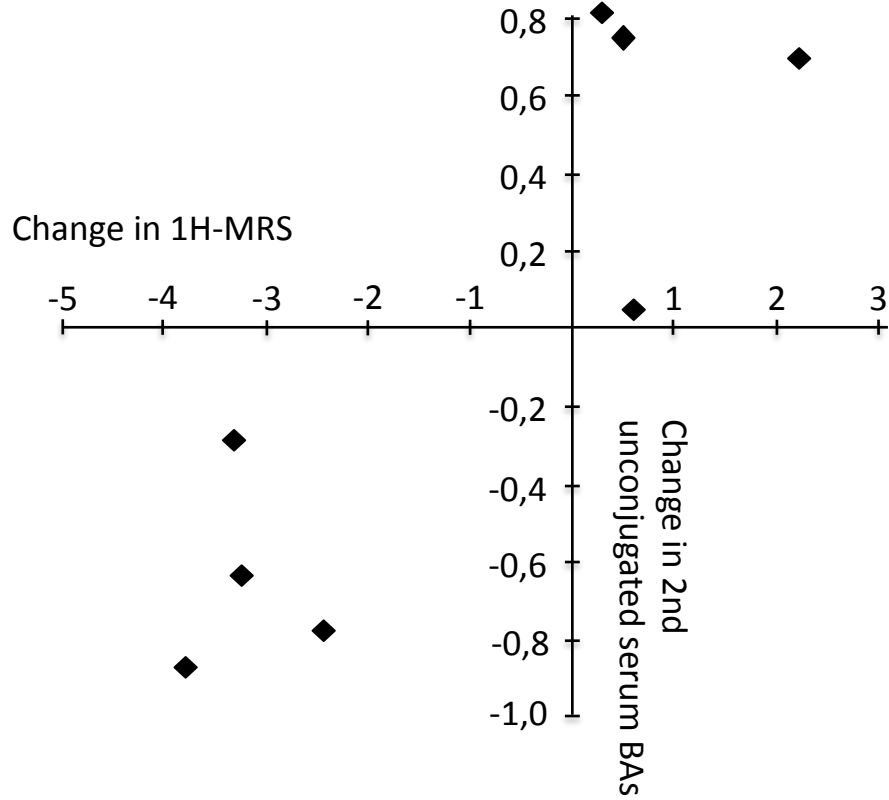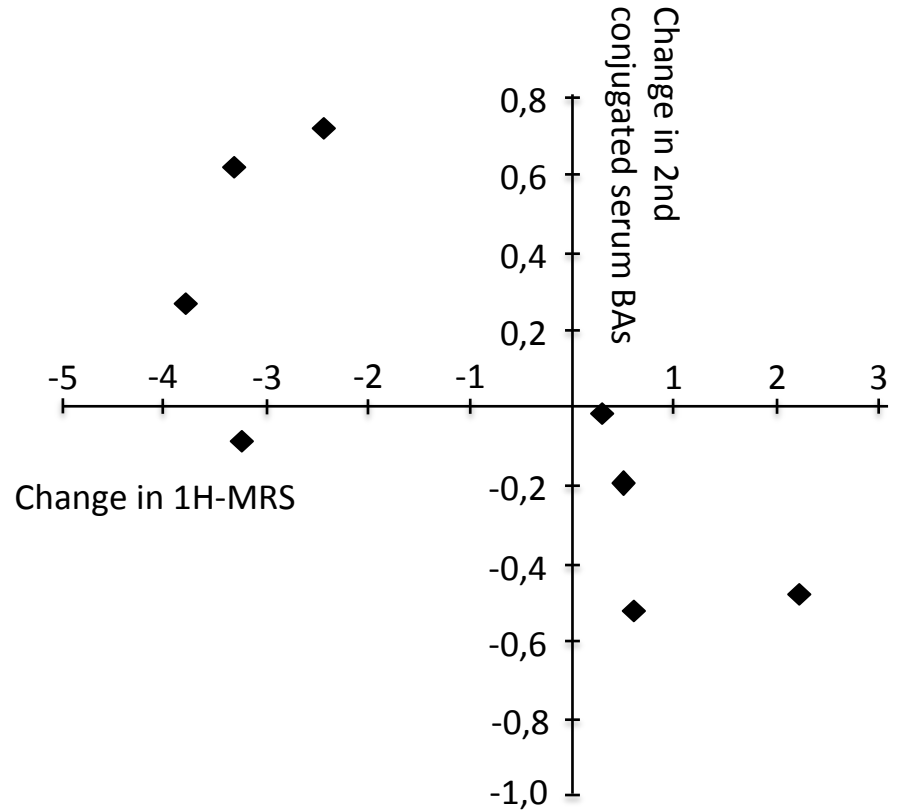

Supplement: MOESM3 [file 18381414]
